# Supplementary material for: Defining metrics of the Quasi-Biennial Oscillation in global climate models
Source: Copernicus journal article supplement (doi:10.5194/gmd-10-2157-2017), 2017-06-08
Supplement: Supplementary file 1 [file gmd-10-2157-2017-supplement.pdf]

Supplement of Geosci. Model Dev., 10, 2157–2168, 2017  
<https://doi.org/10.5194/gmd-10-2157-2017-supplement>  
© Author(s) 2017. This work is distributed under  
the Creative Commons Attribution 3.0 License.

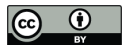

*Supplement of*

## **Defining metrics of the Quasi-Biennial Oscillation in global climate models**

**Verena Schenzinger et al.**

*Correspondence to:* Verena Schenzinger ([schenzinger@atm.ox.ac.uk](mailto:schenzinger@atm.ox.ac.uk))

The copyright of individual parts of the supplement might differ from the CC BY 3.0 License.

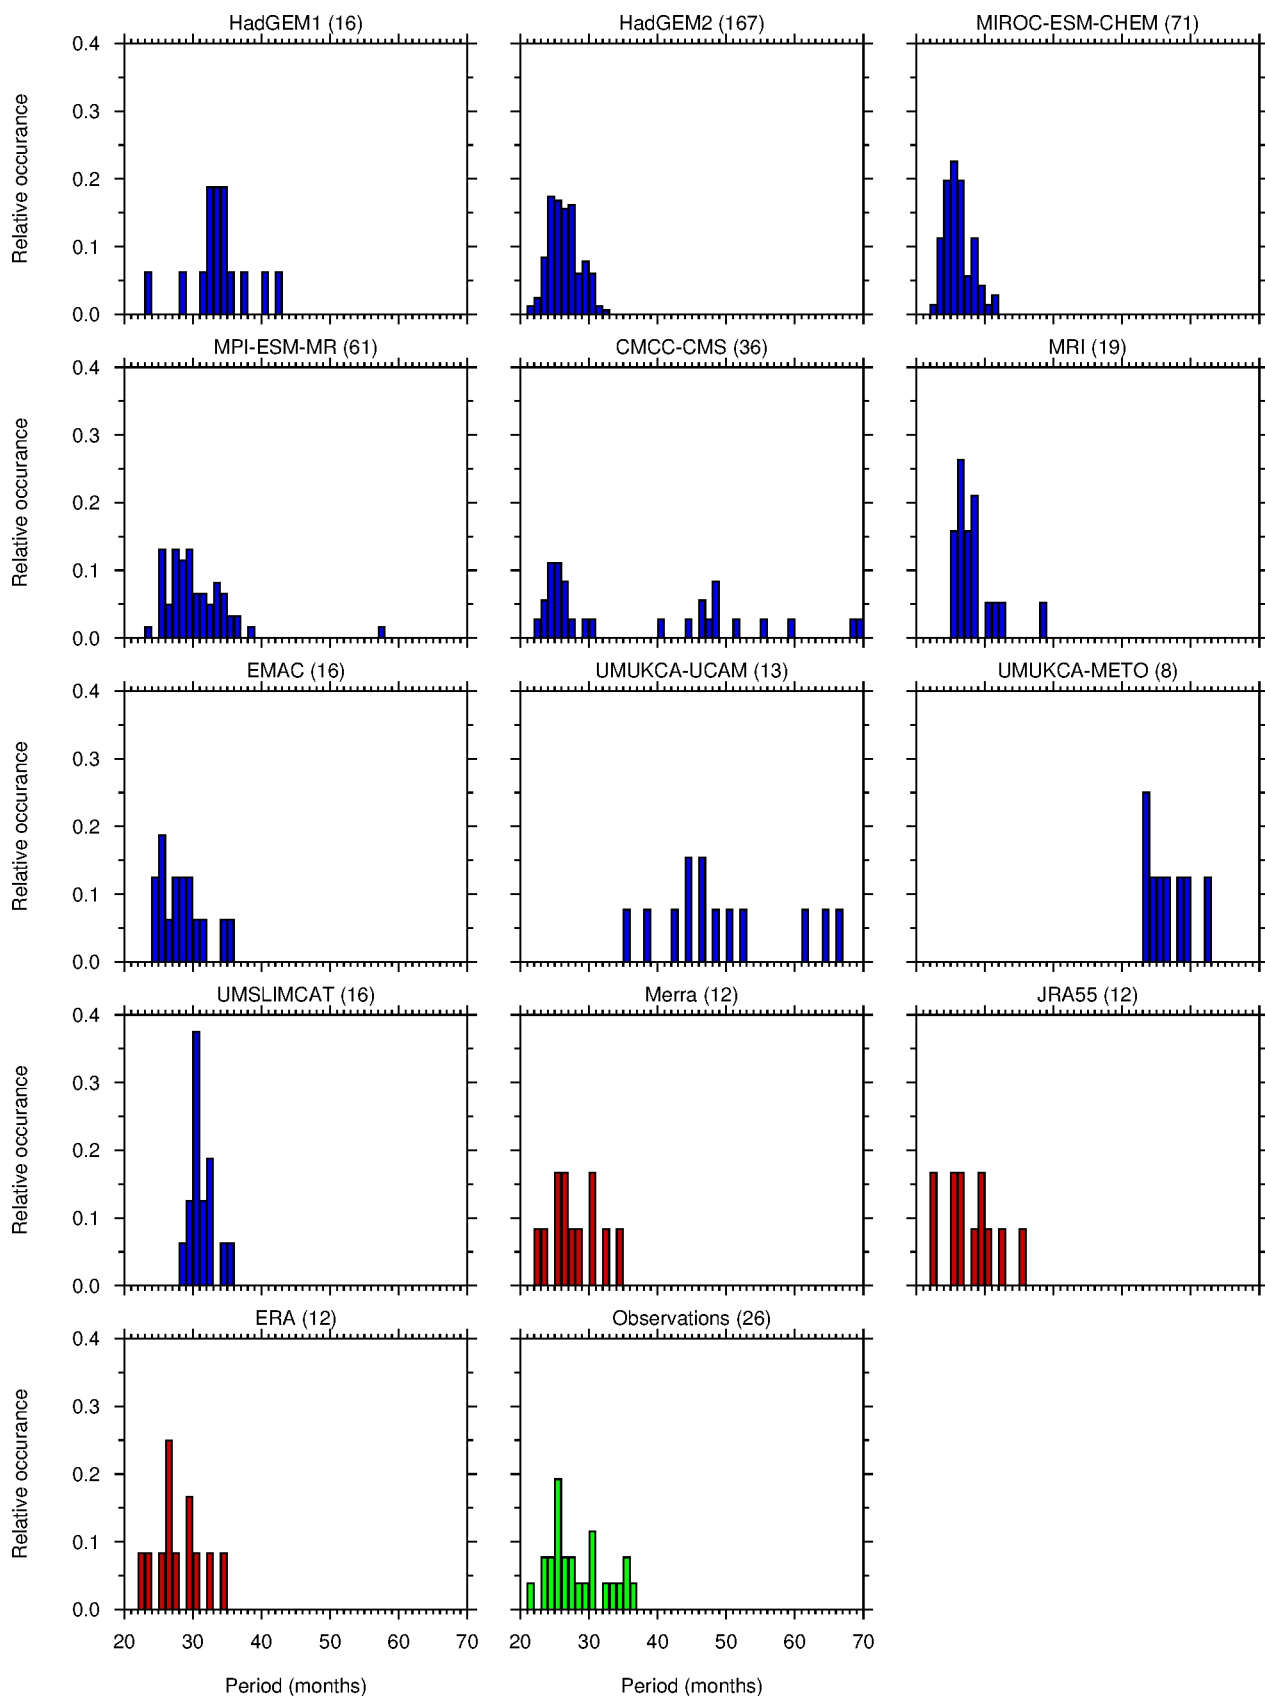

Distribution of periods in models/reanalyses/observations. The numbers in brackets indicate the number of QBO cycles in each dataset.

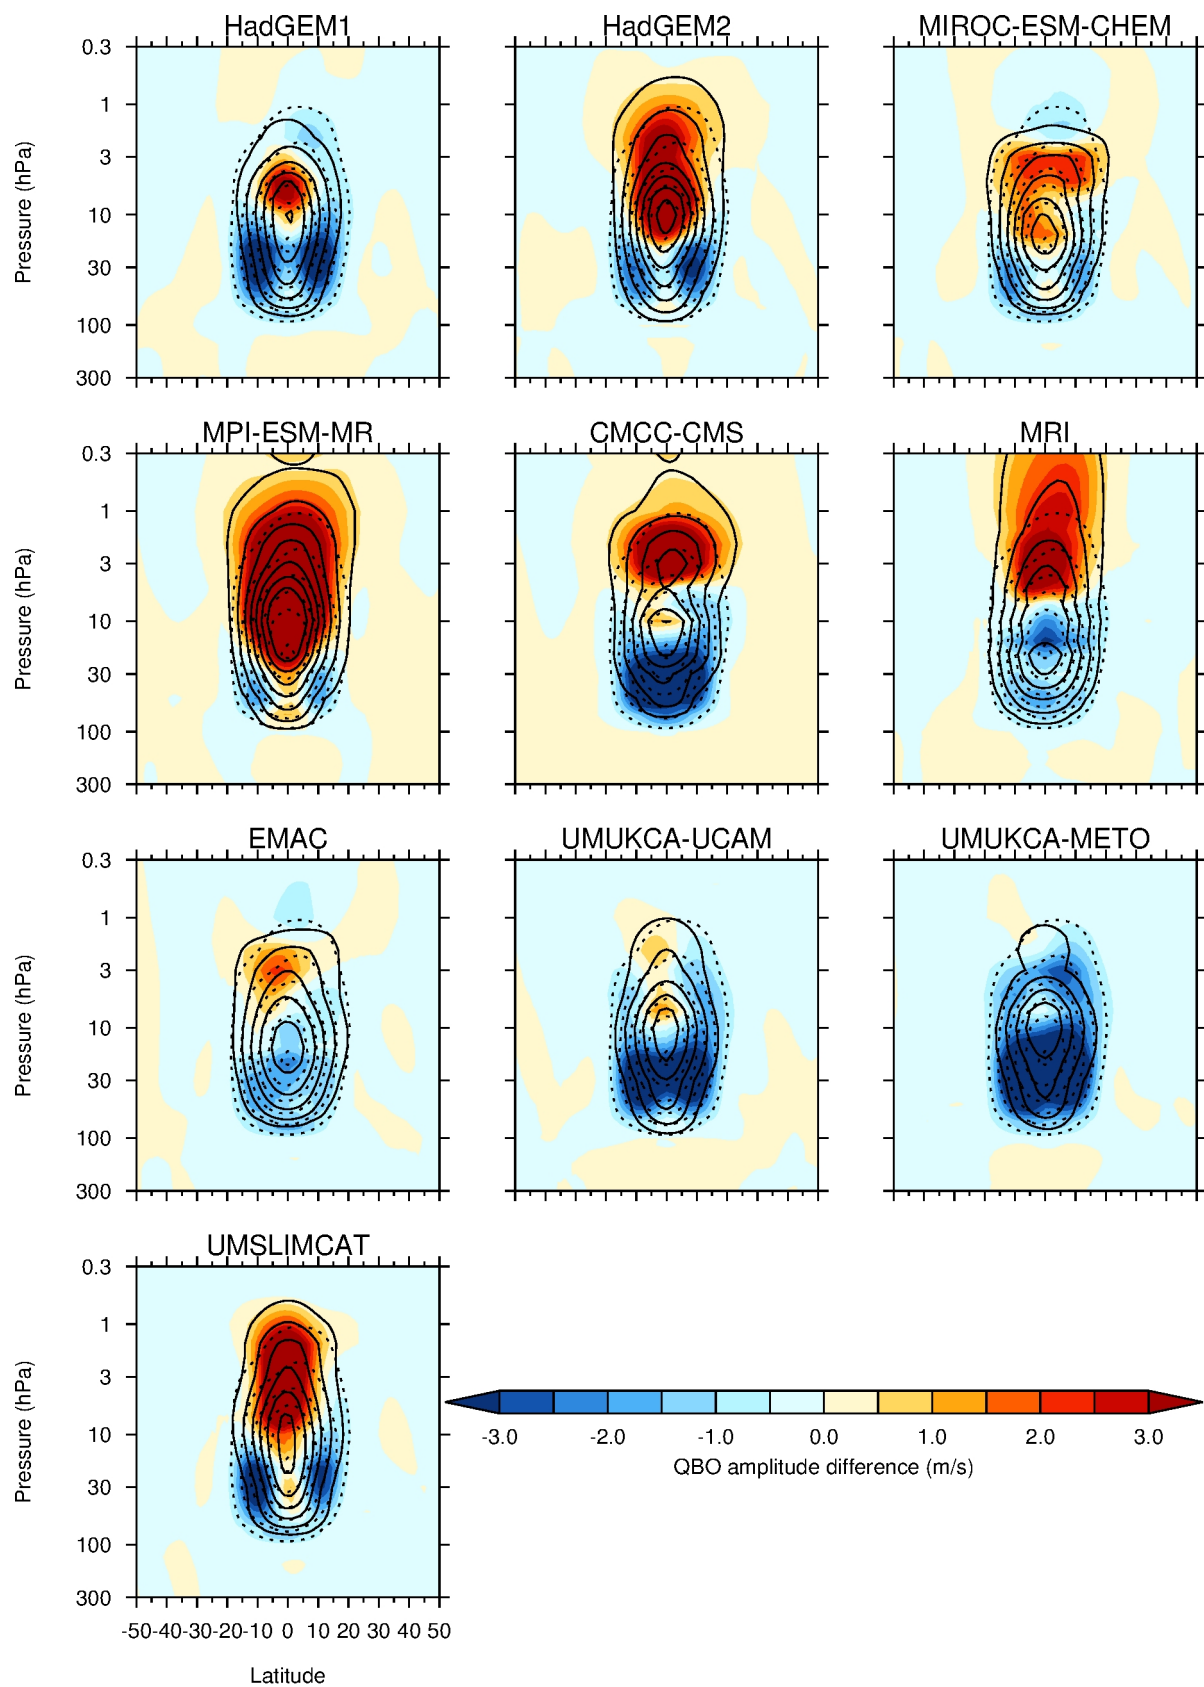

As Figure 4, but for single model QBO Fourier amplitude (zonal wind).

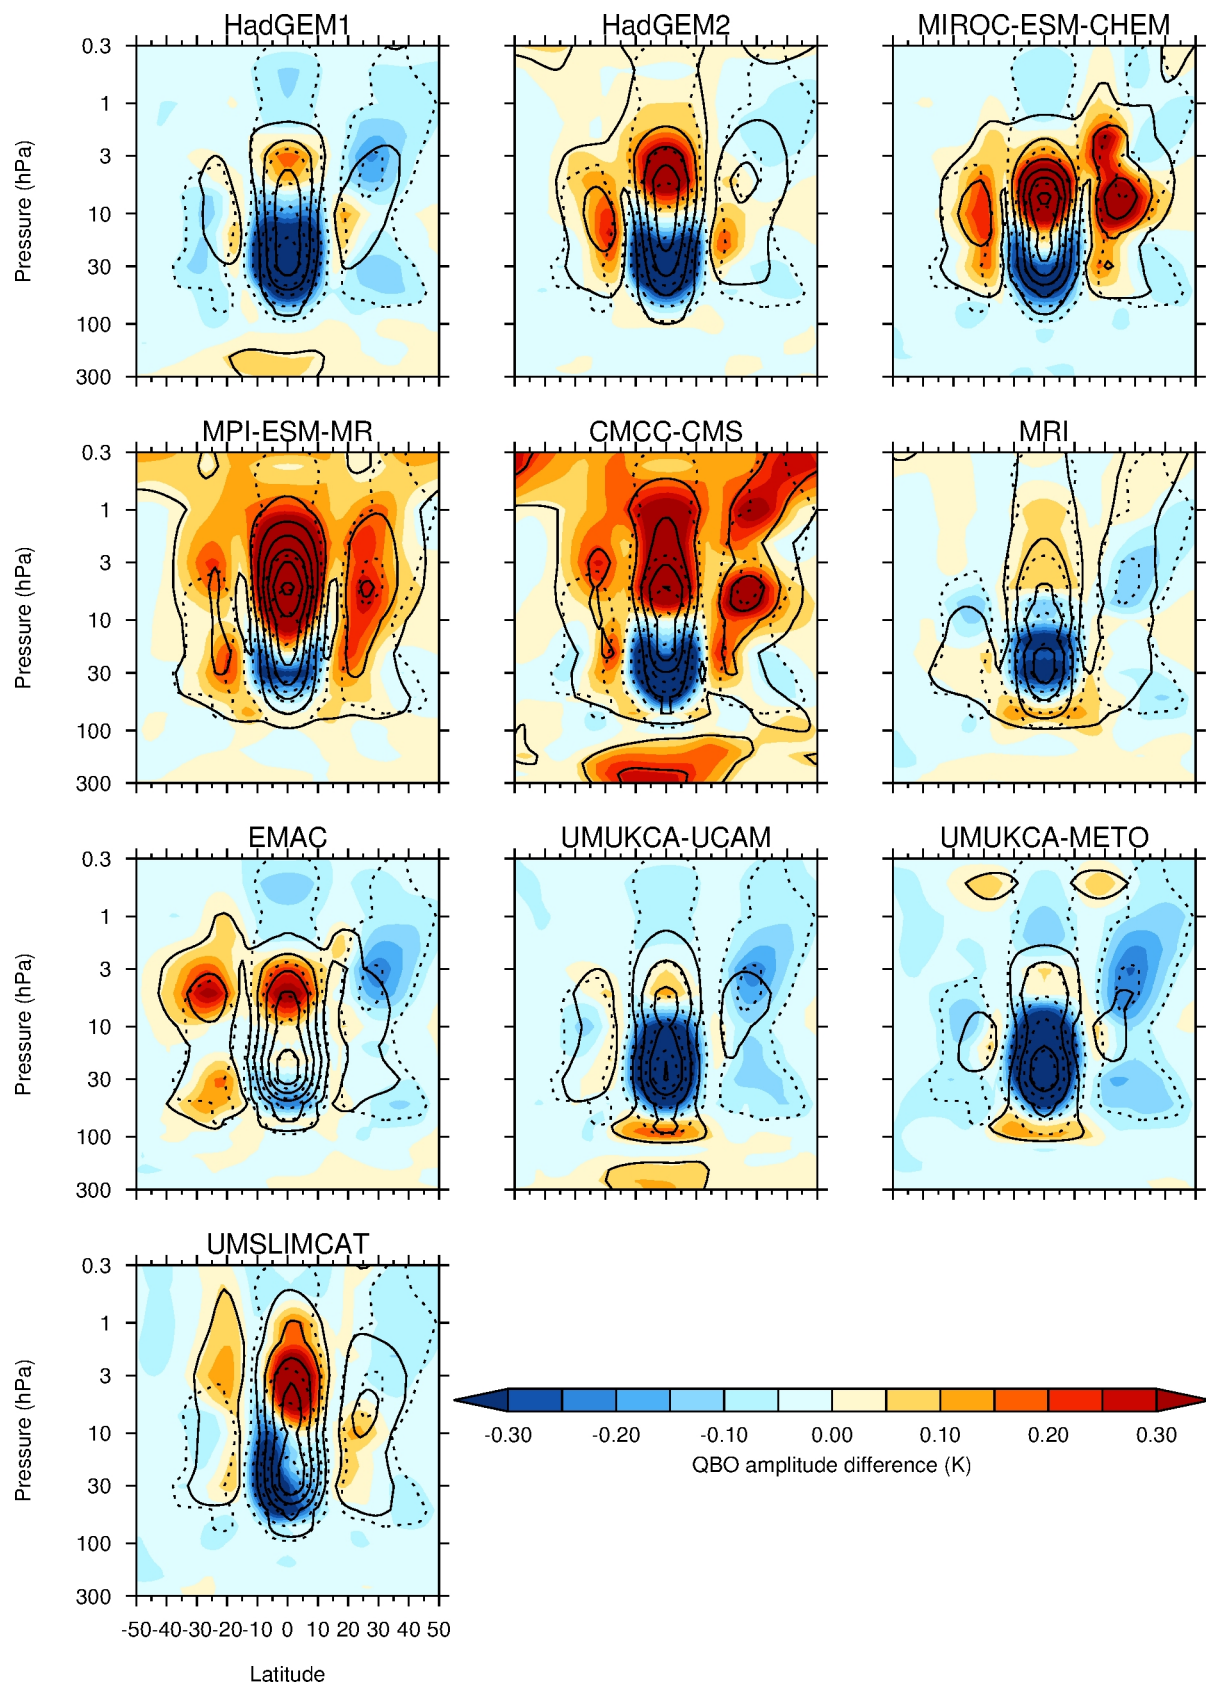

As Figure 4, but for single model QBO Fourier amplitude (temperature).
